# Supplementary material
Source: PubMed Central journal article supplement (PMC6478174)
Supplement: NIHMS1524810-supplement-11764_2019_732_MOESM1_ESM.pdf [file NIHMS1524810-supplement-11764_2019_732_MOESM1_ESM.pdf]

**Online Resource.**

*Survivor and Caregiver Outcomes at Baseline and Six-Week Follow-up*

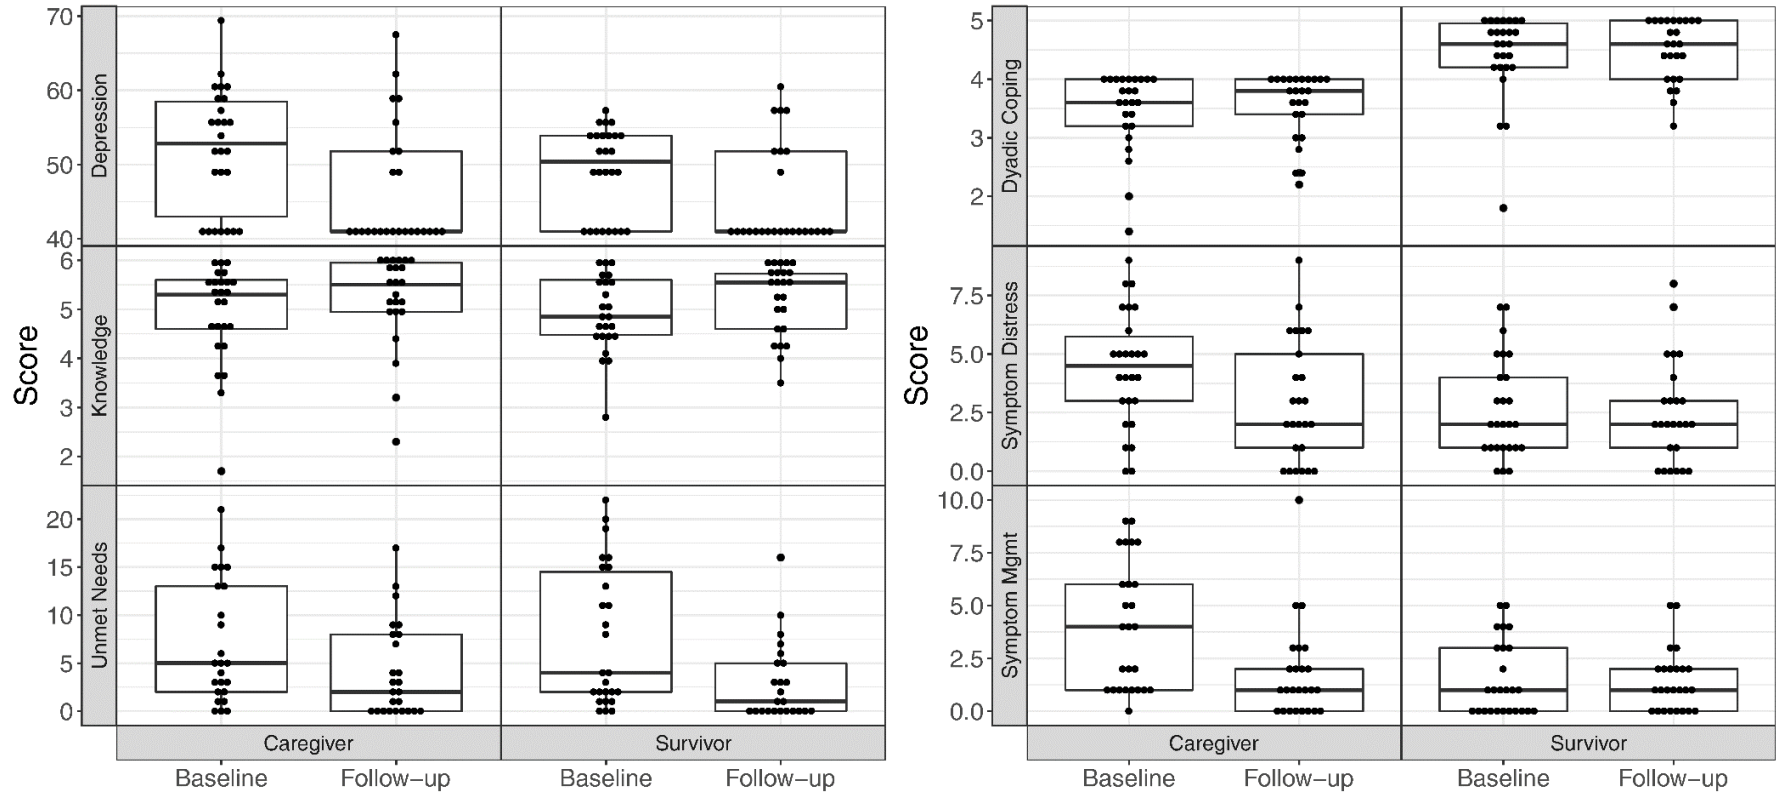

Note: In boxplots, thick lines represent the median and the lower and upper box limits represent the 25<sup>th</sup> and 75<sup>th</sup> percentiles for each outcome.
